# Supplementary material
Source: PubMed Central journal article supplement (PMC7080585)

Supplemental Figure 1

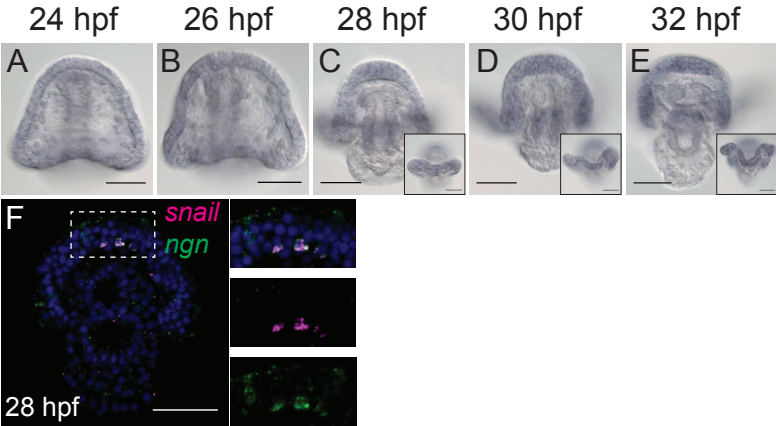

Supplemental Figure 2

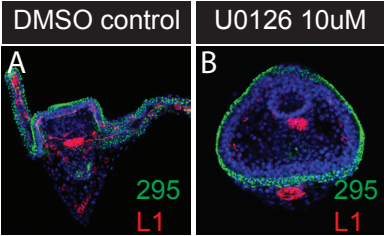

Supp Fig 3

A

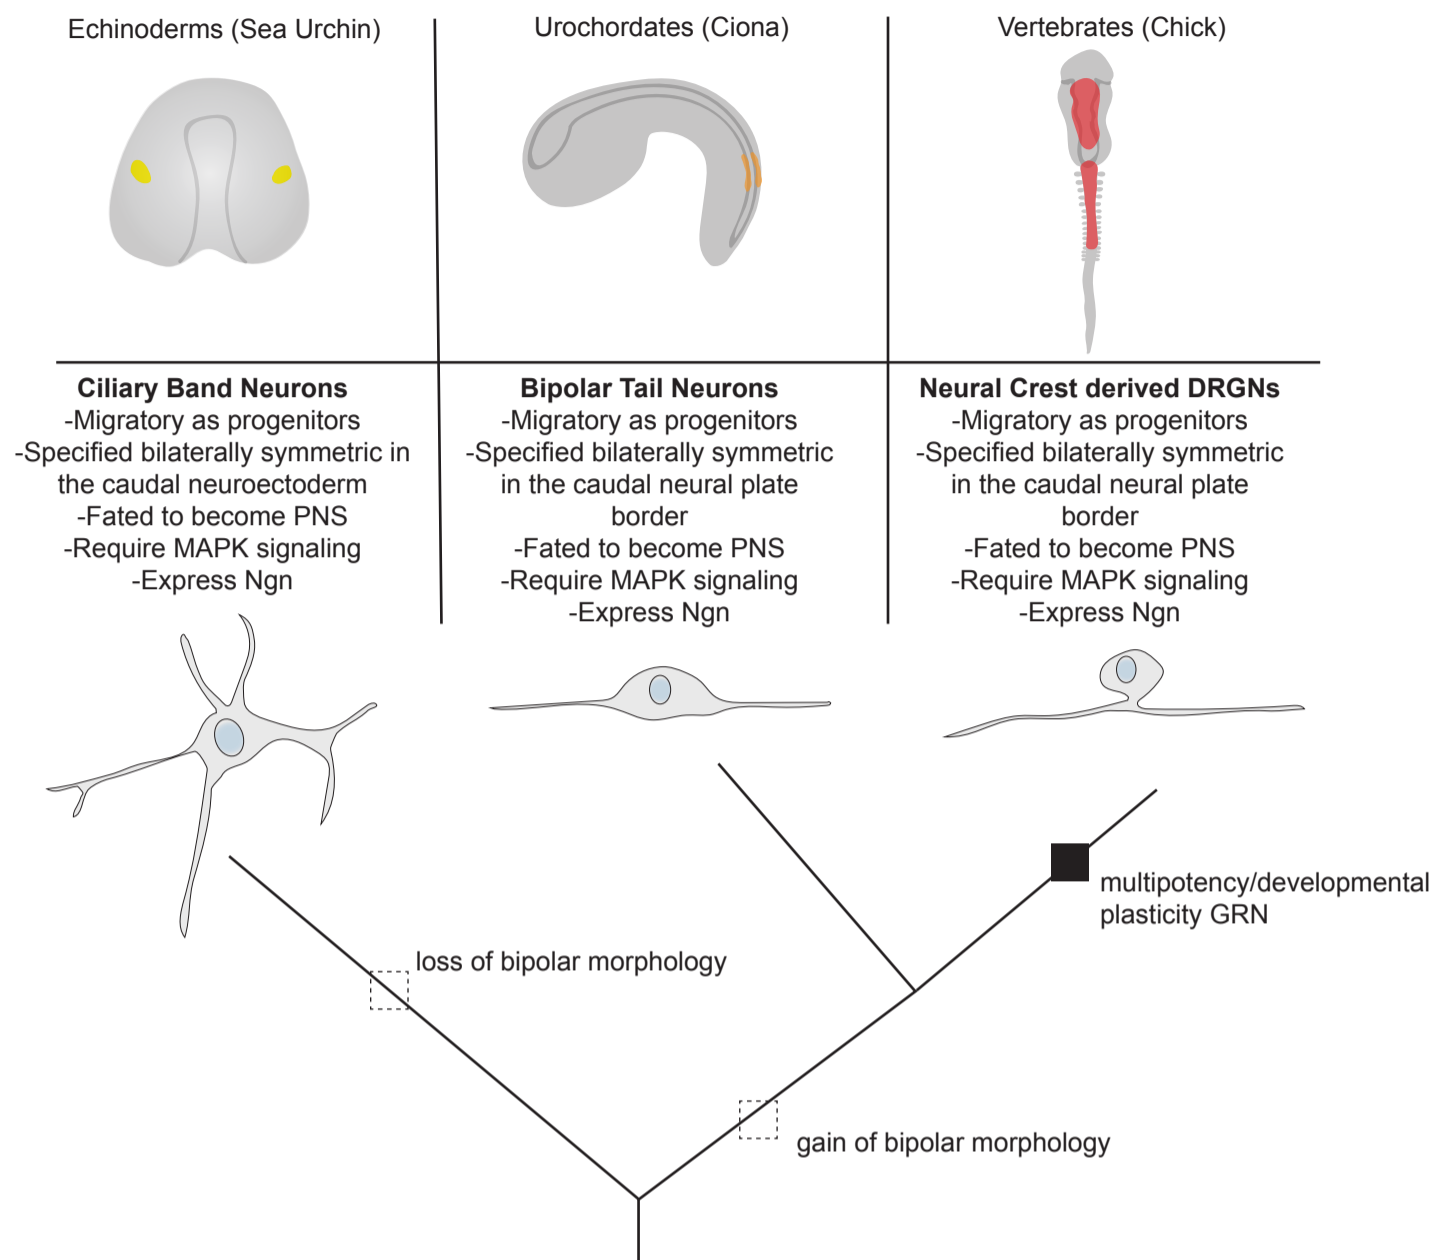

Supplemental Figure 4

Scenario 2: Convergent Evolution

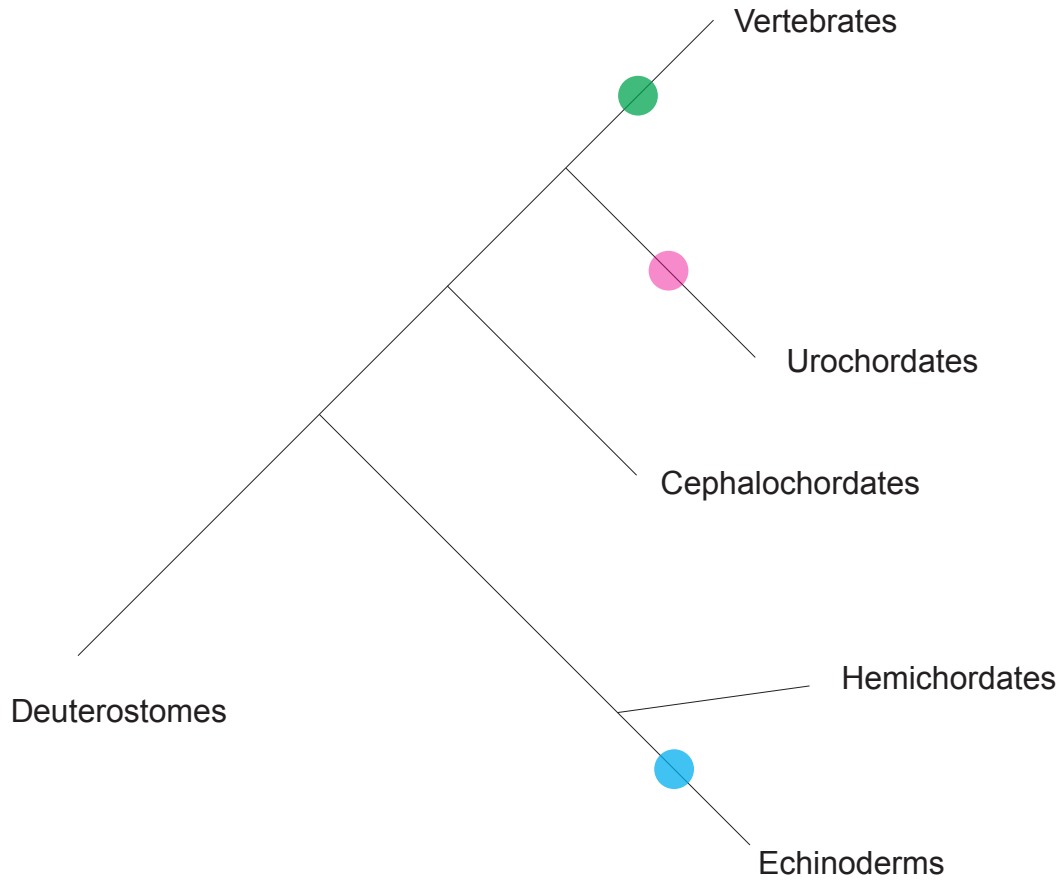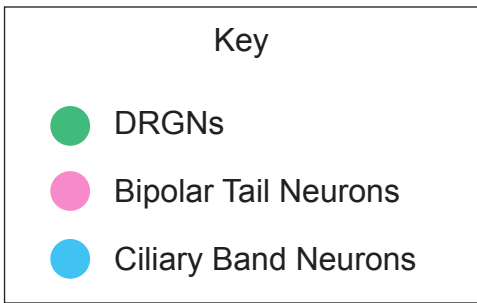

Supplement: NIHMS1548259-supplement-1.pdf [file NIHMS1548259-supplement-1.pdf]
